# Supplementary material for: Dynamic Response of Pseudomonas putida S12 to Sudden Addition of Toluene and the Potential Role of the Solvent Tolerance Gene trgI
Source: PubMed Central journal article supplement (PMC4504468; doi:10.1371/journal.pone.0132416), 2015-07-16

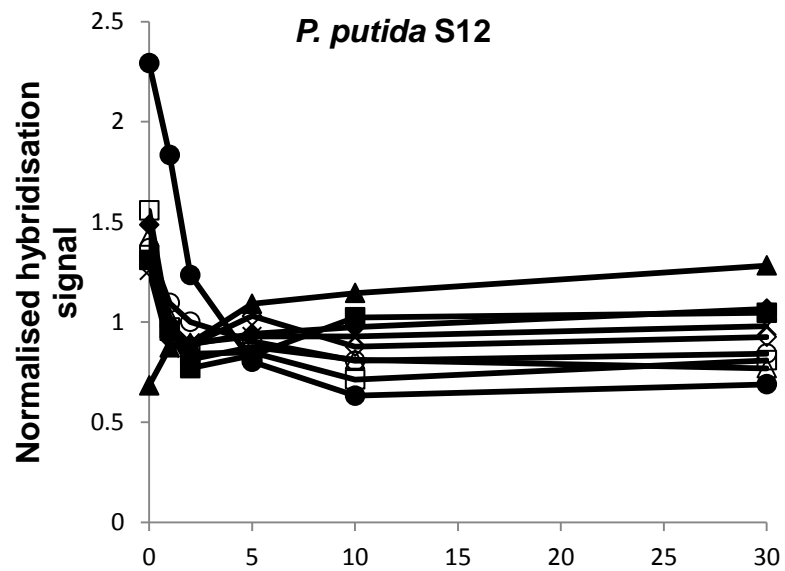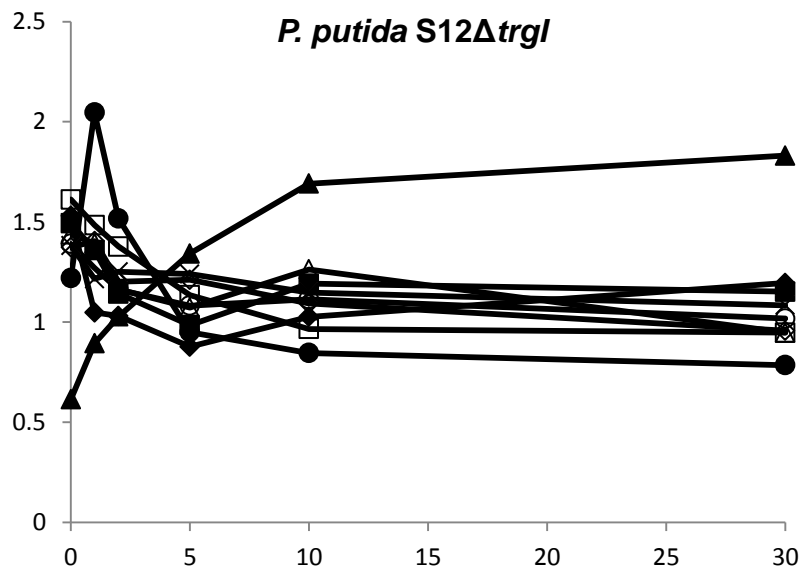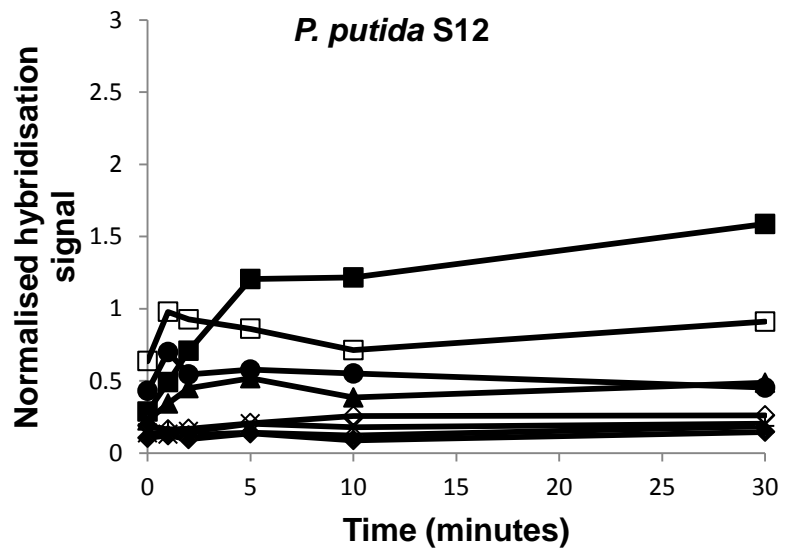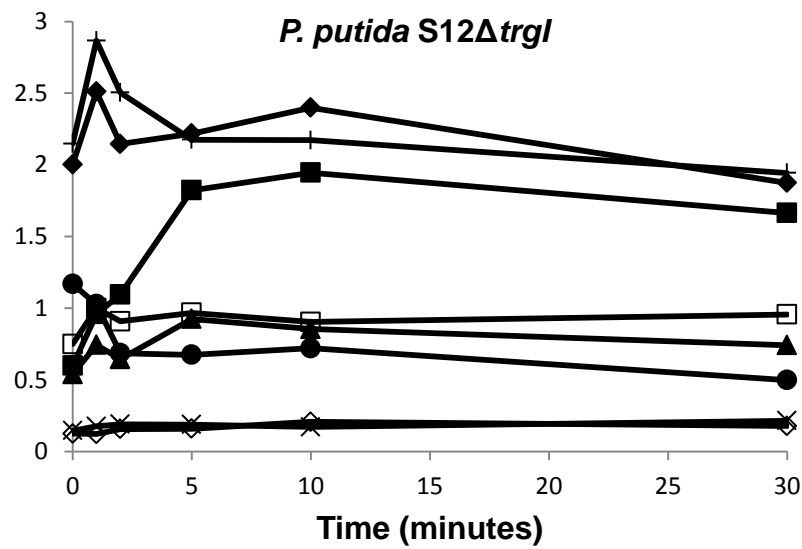

Supplement: pone.0132416.s003.pdf [file pone.0132416.s003.pdf]
